**CORRECTION**

# *Arabidopsis* AIP1-2 restricted by WER-mediated patterning modulates planar polarity

Christian S. Kiefer, Andrea R. Claes, Jean-Claude Nzayisenga, Stefano Pietra, Thomas Stanislas, Anke Hüser, Yoshihisa Ikeda and Markus Grebe

There was an error published in *Development* 142, 151-161.

In the PDF version of the article, a corrupted version of Fig. 4 was shown. The corrected figure appears below and the figure has been replaced in the PDF.

We apologise to the authors and readers for this mistake.

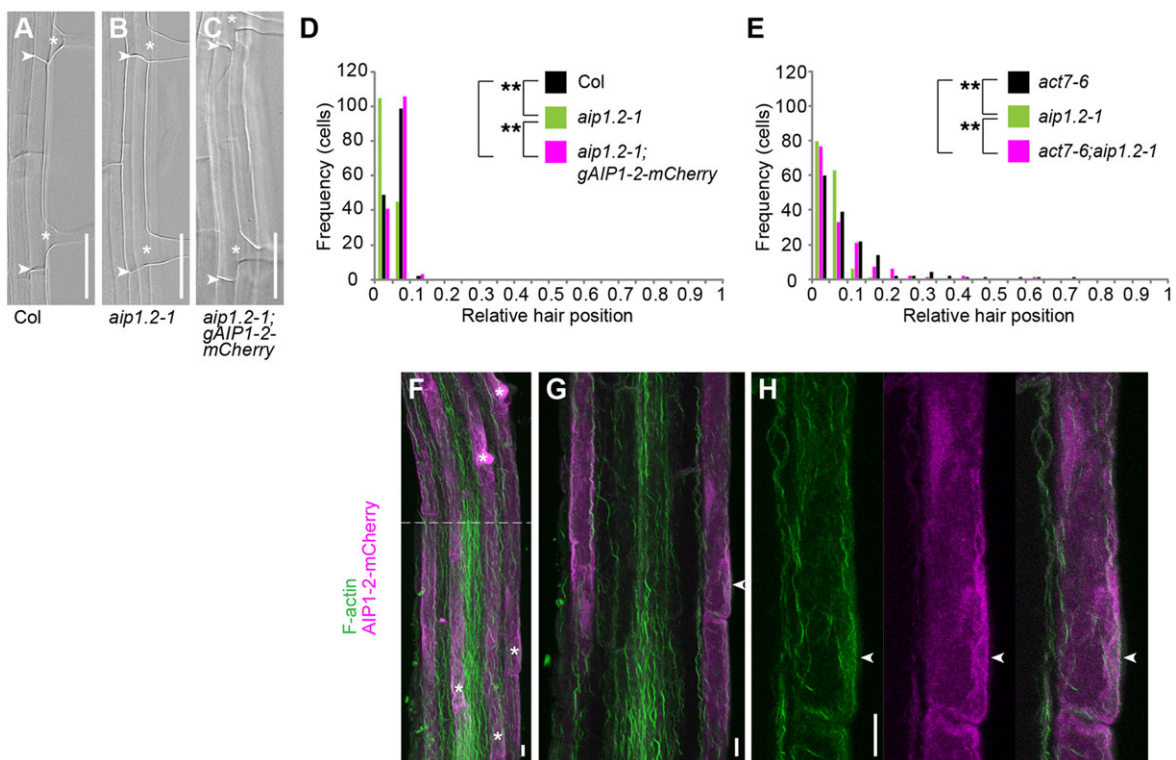

Source: https://cob.silverchair.com/dev/article-pdf/142/5/1022/1841103/dev122697.pdf
